HERRN PROF. DR. HEINRICH HEUSSER  
ZUM 70. GEBURTSTAG

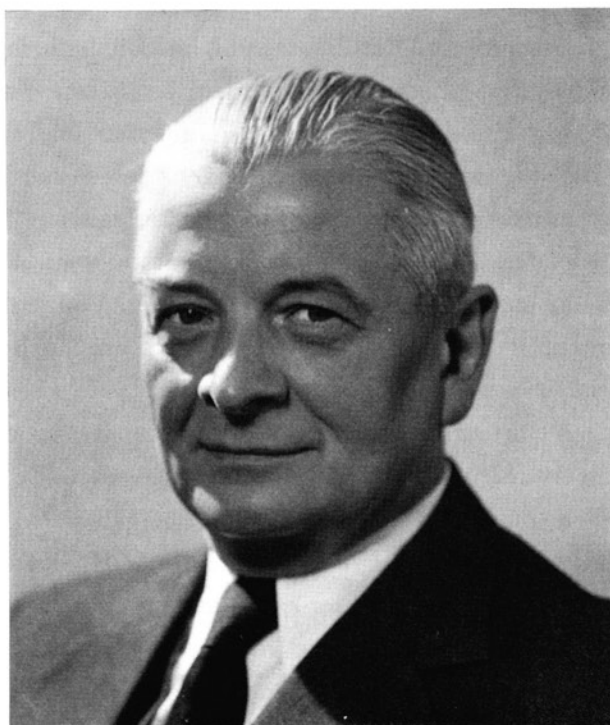

*H. Heusser*

Am 21. September 1964 feiert Professor Dr. Heinrich HEUSSER, derzeitiger Editor principalis der *Urologia internationalis*, seinen siebenzigsten Geburtstag.

Leider ist es dem verehrten Jubilar nicht vergönnt, die Glückwünsche seiner vielen Freunde und Bekannten bei voller Gesundheit entgegenzunehmen. Unsere Gratulationen mögen ihm deshalb vor allem auch beste Wünsche zur baldigen und vollständigen Wiederherstellung von der Erkrankung bedeuten, die ihn vor wenigen Monaten so unerwartet mitten in der Arbeit betroffen hat.

Chirurg aus der Schule von E. Enderlen und G. Hotz, in seiner Neigung zu unserer Spezialität gefördert durch F. Suter, ist sein wissenschaftliches und praktisches urologisches Schaffen in entscheidender Weise durch einen Ausbildungsaufenthalt bei A. von Lichtenberg in Berlin geprägt worden. Von seiner dortigen Assistentenzeit spricht er noch heute mit großer Begeisterung.

Sein wissenschaftliches Interesse galt seit jeher den Auswirkungen chirurgisch-urologischer Erkrankungen auf den Elektrolyt- und Wasserhaushalt der Körperflüssigkeiten. Er gehörte zu den ersten, die versucht haben, bei vorübergehendem Ausfall der Niere als wichtigstem Regulationsprinzip der Homoestase die kritische Periode mit Hilfe eines extrarenalen Epurationsverfahrens, damals der Peritonealdialyse, zu überbrücken. An der Aufwertung, die diese Methode neuerdings wieder erlebt, nimmt er deshalb großen Anteil. Andere bevorzugte Arbeitsgebiete der letzten Jahre waren theoretische und praktische Aspekte der Harnsteinerkrankung, der Prostataadenomyomatose und der ascendierenden Harnwegsentzündungen.

Seine Bemühungen um die Pflege der urologischen Lehre und Forschung haben weit über die Grenzen der Schweiz hinaus ihre wohlverdiente Anerkennung gefunden, vor kurzem noch zu seiner großen Freude durch die Verleihung der Ehrenmitgliedschaft der Deutschen Gesellschaft für Urologie.

Neben wissenschaftlichen Verdiensten begründen eine Reihe hervorragender charakterlicher Eigenschaften, von denen hier nur die sprichwörtliche Güte, Ehrlichkeit und Geduld sowie sein hohes Verantwortungsbewußtsein angeführt seien, seinen Ruf als überragenden Arzt und Menschen.

Professor Heusser ist kein Freund offizieller Ehrungen, und es ist nicht daran zu zweifeln, daß auch der siebzigste Geburtstag für ihn ein kaum aus der Reihe des Gewohnten herausragender Arbeitstag gewesen wäre. Für seine Freunde, Fachkollegen und Mitarbeiter, denen er in beruflicher und menschlicher Hinsicht Vorbildliches mitgegeben hat, besteht jedoch Grund genug, inne zu halten und mit ihren Glück- und Segenswünschen dem Jubilar von ganzem Herzen ihren Dank auszusprechen.

September 1964

Im Namen der Mitarbeiter der Basler Klinik,  
der Redaktion und des Verlages:

G. RUTISHAUSER    G. MAYOR    TH. KARGER
